# Supplementary material
Source: MDPI journal article supplement (https://www.mdpi.com/2071-1050/16/2/753)
Supplement: s1 [file s1]

## Supplementary Materials

**Table S1.** Systematic literature review database.

| First Author           | First Author Country | Title                                                                                                                                                                                                                             | Journal                                                      | Year | Quartile |
|------------------------|----------------------|-----------------------------------------------------------------------------------------------------------------------------------------------------------------------------------------------------------------------------------|--------------------------------------------------------------|------|----------|
| Chapman, R.J.          | UK                   | Exploring the Value of Risk Management for Projects: Improving Capability Through the Deployment of a Maturity Model                                                                                                              | IEEE Engineering Management Review                           | 2019 | Q3       |
| Javani, B.             | South Africa         | Risk management in IT projects - a case of the South African public sector                                                                                                                                                        | International Journal of Managing Projects in Business       | 2016 | Q1       |
| Bowers, J.             | UK                   | Integrating risk management in the innovation project                                                                                                                                                                             | European Journal of Innovation Management                    | 2014 | Q2       |
| Shimizu, T.            | Japan                | Project managers for risk management: Case for Japan                                                                                                                                                                              | Benchmarking                                                 | 2012 | Q2       |
| Besner, C.             | Canada               | The paradox of risk management; a project management practice perspective                                                                                                                                                         | International Journal of Managing Projects in Business       | 2012 | Q1       |
| Sanchez, H.            | Canada               | Risk management applied to projects, programs, and portfolios                                                                                                                                                                     | International Journal of Managing Projects in Business       | 2009 | Q1       |
| Kutsch, E.             | UK                   | The effect of intervening conditions on the management of project risk                                                                                                                                                            | International Journal of Managing Projects in Business       | 2008 | Q1       |
| McShea, M.             | USA                  | IT value management: Creating a balanced program                                                                                                                                                                                  | IT Professional                                              | 2006 | Q2       |
| Ellis, R.C.T.          | UK                   | Value management practices of leading UK cost consultants                                                                                                                                                                         | Construction Management and Economics                        | 2005 | Q1       |
| Lima, P.F.A.           | Italy                | Project risk management implementation in SMEs: A case study from Italy                                                                                                                                                           | Journal of Technology Management and Innovation              | 2019 | Q3       |
| Hartono, B.            | Indonesia            | The impact of project risk management maturity on performance: Complexity as a moderating variable                                                                                                                                | International Journal of Engineering Business Management     | 2019 | Q3       |
| Rabechini Junior, R.R. | Brazil               | Understanding the impact of project risk management on project performance: An empirical study                                                                                                                                    | Journal of Technology Management and Innovation              | 2013 | Q3       |
| Wang, J.               | Taiwan               | A performance-oriented risk management framework for innovative R&D projects                                                                                                                                                      | Technovation                                                 | 2010 | Q1       |
| Kloss-Grote, B.        | Germany              | How to measure the effectiveness of risk management in engineering design projects? Presentation of RMPASS: a new method for assessing risk management performance and the impact of knowledge management-including a few results | Research in Engineering Design                               | 2008 | Q1       |
| Sato, C.E.Y.           | UK                   | Value co-creation in the management of projects delivering integrated solutions: The case of BT Global Services in the UK                                                                                                         | International Journal of Project Organisation and Management | 2018 | Q3       |

|                  |             |                                                                                                                            |                                                                     |      |    |
|------------------|-------------|----------------------------------------------------------------------------------------------------------------------------|---------------------------------------------------------------------|------|----|
| Male, S.         | UK          | Managing value as a management style for projects                                                                          | International Journal of Project Management                         | 2007 | Q1 |
| Winter, M.       | UK          | Directions for future research in project management: The main findings of a UK government-funded research network         | International Journal of Project Management                         | 2006 | Q1 |
| Liu, Y.          | Netherlands | The co-creation of values-in-use at the front end of infrastructure development programs                                   | International Journal of Project Management                         | 2019 | Q1 |
| Giacomarra, M.   | Italy       | Stakeholder engagement toward value co-creation in the F&B packaging industry                                              | EuroMed Journal of Business                                         | 2019 | Q2 |
| Andersen, E.S.   | Norway      | Value creation using the mission breakdown structure                                                                       | International Journal of Project Management                         | 2014 | Q1 |
| Winter, M.       | UK          | Projects and programmes as value creation processes: A new perspective and some practical implications                     | International Journal of Project Management                         | 2008 | Q1 |
| Lee, O.K.D.      | USA         | Managing dynamic risks in global IT projects: Agile risk-management using the principles of service-oriented architecture  | International Journal of Information Technology and Decision Making | 2013 | Q1 |
| Iyer, K.C.       | India       | Understanding the role of contractor capability in risk management: a comparative case study of two similar projects       | Construction Management and Economics                               | 2020 | Q1 |
| Soares, R.A.     | Brazil      | W4RM: A prescriptive framework based on a wiki to support collaborative risk management in information technology projects | International Journal of Information Systems and Project Management | 2020 | Q2 |
| Tavares, B.G.    | Brazil      | Risk management analysis in Scrum software projects                                                                        | International Transactions in Operational Research                  | 2019 | Q1 |
| Makarenko, Y.    | Ukraine     | Strategic risks management in implementation of it projects                                                                | Academy of Strategic Management Journal                             | 2019 | Q2 |
| Breese, R.       | UK          | The project sponsor role and benefits realisation: More than 'just doing the day job'                                      | International Journal of Project Management                         | 2020 | Q1 |
| Hoseini, E.      | Netherlands | Developing a generic risk maturity model (GRMM) for evaluating risk management in construction projects                    | Journal of Risk Research                                            | 2019 | Q1 |
| Serpell, A.F.    | Chile       | Measuring the performance of project risk management: a preliminary model                                                  | Organization Technology and Management in Construction              | 2019 | NA |
| Zwikaël, O.      | Australia   | The responsibilities of the project owner in benefits realization                                                          | International Journal of Operations & Production Management         | 2019 | Q1 |
| Ahmadi-Javid, A. | Iran        | A Method for Risk Response Planning in Project Portfolio Management                                                        | Project Management Journal                                          | 2020 | Q2 |

|                   |                |                                                                                                                                                                |                                                        |      |    |
|-------------------|----------------|----------------------------------------------------------------------------------------------------------------------------------------------------------------|--------------------------------------------------------|------|----|
| Keshk, A.M.       | Egypt          | Special studies in management of construction project risks, risk concept, plan building, risk quantitative and qualitative analysis, risk response strategies | Alexandria Engineering Journal                         | 2018 | Q1 |
| Fernando, Y.      | Malaysia       | Managing project success using project risk and green supply chain management: A survey of automotive industry                                                 | International Journal of Managing Projects in Business | 2018 | Q1 |
| Zhang, Y.J.       | China          | Effects of risks on the performance of business process outsourcing projects: The moderating roles of knowledge management capabilities                        | International Journal of Project Management            | 2018 | Q1 |
| Toth, Z.          | UK             | Tension in a value co-creation context: A network case study                                                                                                   | Industrial Marketing Management                        | 2018 | Q1 |
| Li, J.            | China          | Traffic Allocation Mode of PPP Highway Project: A Risk Management Approach                                                                                     | Advances in Civil Engineering                          | 2018 | Q3 |
| Jafari, M.        | Iran           | Development and evaluation of a knowledge risk management model for project-based organizations: A multi-stage study                                           | Management Decision                                    | 2011 | Q1 |
| Pimchangthong, D. | Thailand       | Effects of Risk Management Practices on IT Project Success                                                                                                     | Management and Production Engineering Review           | 2017 | Q2 |
| Firmenich, J.     | Switzerland    | Customisable framework for project risk management                                                                                                             | Construction Innovation                                | 2017 | Q1 |
| Shrivastava, S.V. | Australia      | A risk management framework for distributed agile projects                                                                                                     | Information and Software Technology                    | 2017 | Q1 |
| Willumsen, P.     | Denmark        | Value creation through project risk management                                                                                                                 | International Journal of Project Management            | 2019 | Q1 |
| Hwang, B.G.       | Singapore      | Value Management in Singaporean Building Projects: Implementation Status, Critical Success Factors, and Risk Factors                                           | Journal of Management in Engineering                   | 2015 | Q1 |
| Dandage, R.V.     | India          | Strategy development using TOWS matrix for international project risk management based on prioritization of risk categories                                    | International Journal of Managing Projects in Business | 2019 | Q3 |
| Crispim, J.       | Portugal       | Project risk management practices: the organizational maturity influence                                                                                       | International Journal of Managing Projects in Business | 2019 | Q3 |
| Choi, J.          | USA            | Team Integration and Owner Satisfaction: Comparing Integrated Project Delivery with Construction Management at Risk in Health Care Projects                    | Journal of Management in Engineering                   | 2019 | Q1 |
| Doskocil, R.      | Czech Republic | Risk Management and Knowledge Management as Critical Success Factors of Sustainability Projects                                                                | Sustainability                                         | 2018 | Q2 |
| Fernando, Y.      | Malaysia       | Managing project success using project risk and green supply chain management A survey of automotive industry                                                  | International Journal of Managing Projects in Business | 2018 | Q3 |
| Furlong, C.       | Australia      | Risk management, financial evaluation and funding for                                                                                                          | Journal of Environmental Management                    | 2017 | Q1 |

|                          |             |                                                                                                                                                               |                                                         |      |    |
|--------------------------|-------------|---------------------------------------------------------------------------------------------------------------------------------------------------------------|---------------------------------------------------------|------|----|
|                          |             | wastewater and stormwater reuse projects                                                                                                                      |                                                         |      |    |
| Kim, M.                  | South Korea | International Project Risk Management for Nuclear Power Plant (NPP) Construction: Featuring Comparative Analysis with Fossil and Gas Power Plants             | Sustainability                                          | 2017 | Q2 |
| Santos, S.M.G.           | Brazil      | Risk management in petroleum development projects: Technical and economic indicators to define a robust production strategy                                   | Journal of Petroleum Science and Engineering            | 2017 | Q1 |
| Zou, Y.                  | UK          | Developing a tailored RBS linking to BIM for risk management of bridge projects                                                                               | Engineering Construction and Architectural Management   | 2016 | Q3 |
| Lee, H.W.                | USA         | Energy-Related Risk Management in Integrated Project Delivery                                                                                                 | Journal of Construction Engineering and Management      | 2013 | Q1 |
| Perrenoud, A.            | USA         | Using Best-Value Procurement to Measure the Impact of Initial Risk-Management Capability on Qualitative Construction Performance                              | Journal of Management in Engineering                    | 2017 | Q1 |
| Rohaninejad, M.          | Iran        | Application of Risk Analysis Within Value Management: A Case Study in DAM Engineering                                                                         | Journal of Civil Engineering and Management             | 2013 | Q2 |
| Chen, Y.S.               | Taiwan      | A study for project risk management using an advanced MCDM-based DEMATEL-ANP approach                                                                         | Journal of Ambient Intelligence and Humanized Computing | 2019 | Q3 |
| van Popering-Verkerk, J. | Netherlands | Developing collaborative capacity in pilot projects: Lessons from three Dutch flood risk management experiments                                               | Journal of Cleaner Production                           | 2017 | Q1 |
| Shojaei, P.              | Iran        | Development of supply chain risk management approaches for construction projects: A grounded theory approach                                                  | Computers & Industrial Engineering                      | 2019 | Q1 |
| Zaveckaite, A.           | Lithuania   | Assessment Criteria of Project Risk Management in Language Translation Service Companies                                                                      | Technological and Economic Development of Economy       | 2018 | Q2 |
| Zou, Y.                  | UK          | Retrieving similar cases for construction project risk management using Natural Language Processing techniques                                                | Automation in Construction                              | 2017 | Q1 |
| Zhao, X.                 | Singapore   | Construction project risk management in Singapore: Resources, effectiveness, impact, and understanding                                                        | KSCE Journal of Civil Engineering                       | 2014 | Q3 |
| Hwang, B.G.              | Singapore   | Risk management in small construction projects in Singapore: Status, barriers and impact                                                                      | International Journal of Project Management             | 2014 | Q1 |
| Moeini, M.               | UK          | Sublating Tensions in the IT Project Risk Management Literature: A Model of the Relative Performance of Intuition and Deliberate Analysis for Risk Assessment | Journal of the Association for Information Systems      | 2019 | Q1 |
| Shokri, S.               | Canada      | Interface-management process for                                                                                                                              | Journal of Construction                                 | 2016 | Q1 |

|                   |                      |                                                                                                                                                             |                                                        |      |    |
|-------------------|----------------------|-------------------------------------------------------------------------------------------------------------------------------------------------------------|--------------------------------------------------------|------|----|
|                   |                      | managing risks in complex capital projects                                                                                                                  | Engineering and Management                             |      |    |
| Liu, S.           | China                | How the user liaison's understanding of development processes moderates the effects of user-related and project management risks on IT project performance  | Information & Management                               | 2016 | Q1 |
| De Carvalho, M.M. | Brazil               | Impact of risk management on project performance: the importance of soft skills                                                                             | International Journal of Production Research           | 2015 | Q1 |
| Liu, J.           | China                | The effects of project uncertainty and risk management on IS development project performance: A vendor perspective                                          | International Journal of Project Management            | 2011 | Q1 |
| Badewi, A.        | UK                   | The impact of project management (PM) and benefits management (BM) practices on project success: Towards developing a project benefits governance framework | International Journal of Project Management            | 2016 | Q1 |
| Martinsuo, M.     | Finland              | Change program management: Toward a capability for managing value-oriented, integrated multi-project change in its context                                  | International Journal of Project Management            | 2018 | Q1 |
| Surlan, N.        | Serbia               | Use of Value Management Workshops and Critical Success Factors in Introducing Local Experience on the International Construction Projects                   | Journal of Civil Engineering and Management            | 2016 | Q2 |
| Qazi, A.          | Scotland             | Project Complexity and Risk Management (ProCRiM): Towards modelling project complexity driven risk paths in construction projects                           | International Journal of Project Management            | 2016 | Q1 |
| Mir, F.A.         | United Arab Emirates | Exploring the value of project management: Linking Project Management Performance and Project Success                                                       | International Journal of Project Management            | 2014 | Q1 |
| Shi, Q.           | China                | Rethinking the implementation of project management: A Value Adding Path Map approach                                                                       | International Journal of Project Management            | 2011 | Q1 |
| Neap, H.S.        | Turkey               | Owner's factor in value-based project management in construction                                                                                            | Journal of Business Ethics                             | 2004 | Q1 |
| Svejvig, P.       | Denmark              | The Danish agenda for rethinking project management                                                                                                         | International Journal of Managing Projects in Business | 2016 | Q3 |
| Andersen, E.S.    | Norway               | Do project managers have different perspectives on project management?                                                                                      | International Journal of Project Management            | 2016 | Q1 |
| Serra, C.E.M.     | UK                   | Benefits Realisation Management and its influence on project success and on the execution of business strategies                                            | International Journal of Project Management            | 2015 | Q1 |
| Voss, M.          | Germany              | Impact of customer integration on project portfolio management and its success-Developing a conceptual framework                                            | International Journal of Project Management            | 2012 | Q1 |
| Chih, Y.Y.        | Australia            | Enhancing value co-creation in professional service projects: The roles of professionals, clients and their effective interactions                          | International Journal of Project Management            | 2019 | Q1 |

|                   |             |                                                                                                                                    |                                                        |      |    |
|-------------------|-------------|------------------------------------------------------------------------------------------------------------------------------------|--------------------------------------------------------|------|----|
| Green, S.D.       | UK          | Value creation in projects: Towards a narrative perspective                                                                        | International Journal of Project Management            | 2019 | Q1 |
| Fuentes, M.       | UK          | Co-creation of value outcomes: A client perspective on service provision in projects                                               | International Journal of Project Management            | 2019 | Q1 |
| Pargar, F.        | Finland     | Value creation dynamics in a project alliance                                                                                      | International Journal of Project Management            | 2019 | Q1 |
| Laursen, M.       | Denmark     | Programming for holistic value creation: collaboration, coordination and perception                                                | International Journal of Managing Projects in Business | 2019 | Q3 |
| Lehtinen, J.      | Finland     | Megaprojects as organizational platforms and technology platforms for value creation                                               | International Journal of Project Management            | 2019 | Q1 |
| Hwang, B.G.       | Singapore   | Project network management: risks and contributors from the viewpoint of contractors and sub-contractors                           | Technological and Economic Development of Economy      | 2016 | Q2 |
| Heredia Rojas, B. | Australia   | Moderated effect of value co-creation on project performance                                                                       | International Journal of Managing Projects in Business | 2018 | Q3 |
| Smyth, H.         | UK          | Co-creation of value and the project context: Towards application on the case of Hinkley Point C Nuclear Power Station             | International Journal of Project Management            | 2018 | Q1 |
| Yan, T.           | USA         | Do what and with whom? Value creation and appropriation in inter-organizational new product development projects                   | International Journal of Production Economics          | 2017 | Q1 |
| Hjelmbrekke, H.   | Norway      | Governing value creation in construction project: a new model                                                                      | International Journal of Managing Projects in Business | 2017 | Q3 |
| Matinheikki, J.   | Finland     | Managing inter-organizational networks for value creation in the front-end of projects                                             | International Journal of Project Management            | 2016 | Q1 |
| Laursen, M.       | Denmark     | Taking stock of project value creation: A structured literature review with future directions for research and practice            | International Journal of Project Management            | 2016 | Q1 |
| Artto, K.         | Finland     | From the front end of projects to the back end of operations: Managing projects for value creation throughout the system lifecycle | International Journal of Project Management            | 2016 | Q1 |
| Murthy, C.        | India       | An empirical investigation of the antecedents of value co-creation in B2B IT services outsourcing                                  | Business Process Management Journal                    | 2016 | Q3 |
| Chang, A.         | Australia   | Reconceptualising mega project success in Australian Defence: Recognising the importance of value co-creation                      | International Journal of Project Management            | 2013 | Q1 |
| Cárdenas, I.C.    | Netherlands | Using prior risk-related knowledge to support risk management decisions: Lessons learnt from a tunneling project                   | Risk Analysis                                          | 2014 | Q1 |
| Shimizu, T.       | Japan       | Project managers and risk management: A comparative study between Japanese and Korean firms                                        | International Journal of Production Economics          | 2014 | Q1 |
| Martinsuo, M.     | Finland     | Value Management in Project Portfolios: Identifying and Assessing Strategic Value                                                  | Project Management Journal                             | 2014 | Q2 |

|                      |             |                                                                                                                                   |                                             |      |    |
|----------------------|-------------|-----------------------------------------------------------------------------------------------------------------------------------|---------------------------------------------|------|----|
| Mu, S.Y.             | China       | Assessing risk management capability of contractors in subway projects in mainland China                                          | International Journal of Project Management | 2014 | Q1 |
| Teller, J.           | Germany     | Risk Management in Project Portfolios Is More Than Managing Project Risks: A Contingency Perspective on Risk Management           | Project Management Journal                  | 2014 | Q2 |
| Kutsch, E.           | UK          | Bridging the risk gap: the failure of risk management in information systems projects                                             | Research-Technology Management              | 2014 | Q3 |
| Marcelino-Sadaba, S. | Spain       | Project risk management methodology for small firms                                                                               | International Journal of Project Management | 2014 | Q1 |
| Neves, S.M.          | Brazil      | Risk management in software projects through Knowledge Management techniques: Cases in Brazilian Incubated Technology-Based Firms | International Journal of Project Management | 2014 | Q1 |
| Teller, J.           | Germany     | An empirical investigation on how portfolio risk management influences project portfolio success                                  | International Journal of Project Management | 2013 | Q1 |
| Osipova, E.          | Sweden      | Balancing control and flexibility in joint risk management: Lessons learned from two construction projects                        | International Journal of Project Management | 2013 | Q1 |
| De Bakker, K.        | Netherlands | Risk managements' communicative effects influencing IT project success                                                            | International Journal of Project Management | 2012 | Q1 |
| Krane, H.P.          | Norway      | How project manager-project owner interaction can work within and influence project risk management                               | Project Management Journal                  | 2012 | Q1 |
| Taylor, H.           | USA         | Information technology project risk management: bridging the gap between research and practice                                    | Journal of Information Technology           | 2012 | Q1 |
| Papadopoulos, T.     | UK          | The criticality of risk factors in customer relationship management projects                                                      | Project Management Journal                  | 2012 | Q2 |
| Osipova, E.          | Sweden      | How procurement options influence risk management in construction projects                                                        | Construction Management and Economics       | 2011 | Q1 |
| De Bakker, K.        | Netherlands | Risk Management Affecting IS/IT Project Success Through Communicative Action                                                      | Project Management Journal                  | 2011 | Q1 |
| Zwikaël, O.          | Australia   | The Effectiveness of Risk Management: An Analysis of Project Risk Planning Across Industries and Countries                        | Risk Analysis                               | 2011 | Q1 |
| Gil, N.              | UK          | Project risk management and design flexibility: Analysing a case and conditions of complementarity                                | Research Policy                             | 2011 | Q1 |
| de Bakker, K.        | Netherlands | Does risk management contribute to IT project success? A meta-analysis of empirical evidence                                      | International Journal of Project Management | 2010 | Q1 |
| Kutsch, E.           | UK          | Deliberate ignorance in project risk management                                                                                   | International Journal of Project Management | 2010 | Q1 |

|            |           |                                                                                                                                       |                                             |      |    |
|------------|-----------|---------------------------------------------------------------------------------------------------------------------------------------|---------------------------------------------|------|----|
| Doloi, H.  | Australia | Relational partnerships: The importance of communication, trust and confidence and joint risk management in achieving project success | Construction Management and Economics       | 2009 | Q1 |
| Kutsch, E. | UK        | The Rational Choice of Not Applying Project Risk Management in Information Technology Projects                                        | Project Management Journal                  | 2009 | Q2 |
| Taylor, H. | USA       | Congruence between risk management theory and practice in Hong Kong vendor-driven IT projects                                         | International Journal of Project Management | 2005 | Q1 |
